# Supplementary material for: The effect of magnetic coupling along the magnetic axis on slow magnetic relaxation in DyIII complexes with D5h configuration based on an aggregation-induced-emission-active ligand
Source: Royal Society of Chemistry journal article supplement (doi:10.1039/d3dt04257j), 2024-01-01
Supplement: d3dt04257j1.pdf [file d3dt04257j1.pdf]

## The effect of magnetic coupling along the magnetic axis on slow magnetic relaxation in Dy<sup>III</sup> complexes with $D_{5h}$ configuration based on an aggregation-induced-emission-active ligand

Min-Xia Yao<sup>\*a</sup>, Yu-Qi Gao<sup>a</sup>, Zhong-Wu An<sup>a</sup> and Dong-Mei Zhu<sup>\*b</sup>

<sup>a</sup>*School of Chemistry & Molecular Engineering, Nanjing Tech University, Nanjing, 211816, P. R. China.*

<sup>b</sup>*Jiangsu Key Lab for NSLSCS, School of Physical Science and Technology, Nanjing Normal University, Nanjing 210023, P. R. China.*

Table S1 Summary of crystallographic data for all complexes.

| complexes                                  | 1                                                                                                             | 2                                                                                                              | 3                                                                                                               |
|--------------------------------------------|---------------------------------------------------------------------------------------------------------------|----------------------------------------------------------------------------------------------------------------|-----------------------------------------------------------------------------------------------------------------|
| molecular formula                          | C <sub>94</sub> H <sub>110</sub> Cl <sub>2</sub> Dy <sub>2</sub> N <sub>8</sub> O <sub>8</sub> P <sub>2</sub> | C <sub>102</sub> H <sub>112</sub> Cl <sub>2</sub> Dy <sub>2</sub> N <sub>6</sub> O <sub>6</sub> P <sub>2</sub> | C <sub>98</sub> H <sub>102</sub> Cl <sub>2</sub> Dy <sub>2</sub> N <sub>12</sub> O <sub>12</sub> P <sub>2</sub> |
| formular weight                            | 1933.70                                                                                                       | 1975.81                                                                                                        | 2097.75                                                                                                         |
| crystal system                             | Triclinic                                                                                                     | Triclinic                                                                                                      | Orthorhombic                                                                                                    |
| space group                                | <i>P</i> -1                                                                                                   | <i>P</i> -1                                                                                                    | <i>Pbca</i>                                                                                                     |
| <i>a</i> , Å                               | 11.7971(5)                                                                                                    | 11.1140(6)                                                                                                     | 24.0573(8)                                                                                                      |
| <i>b</i> , Å                               | 13.9098(7)                                                                                                    | 15.1554(9)                                                                                                     | 36.8217(13)                                                                                                     |
| <i>c</i> , Å                               | 16.1086(7)                                                                                                    | 15.9704(9)                                                                                                     | 10.7953(4)                                                                                                      |
| <i>a</i> , deg                             | 65.090(2)°                                                                                                    | 64.553(2)                                                                                                      | 90                                                                                                              |
| <i>β</i> , deg                             | 82.000(2)°                                                                                                    | 85.699(2)                                                                                                      | 90                                                                                                              |
| <i>γ</i> , deg                             | 74.102(2)°                                                                                                    | 77.051(2)                                                                                                      | 90                                                                                                              |
| <i>V</i> , Å <sup>3</sup>                  | 2304.88(19)                                                                                                   | 2366.6(2)                                                                                                      | 9562.8(6)                                                                                                       |
| <i>Z</i>                                   | 1                                                                                                             | 1                                                                                                              | 4                                                                                                               |
| $\rho_{\text{calcd}}$ , g cm <sup>-3</sup> | 1.393                                                                                                         | 1.386                                                                                                          | 1.457                                                                                                           |
| <i>T</i> / K                               | 193                                                                                                           | 193                                                                                                            | 193                                                                                                             |
| $\mu$ , mm <sup>-1</sup>                   | 1.759                                                                                                         | 1.713                                                                                                          | 1.706                                                                                                           |
| $\theta$ , deg                             | 2.121 to 26.000                                                                                               | 2.153 to 26.000                                                                                                | 2.022 to 27.506                                                                                                 |
| <i>F</i> (000)                             | 986                                                                                                           | 1010                                                                                                           | 4264                                                                                                            |
| index ranges                               | -14 ≤ <i>h</i> ≤ 14<br>-17 ≤ <i>k</i> ≤ 17<br>-19 ≤ <i>l</i> ≤ 19                                             | -13 ≤ <i>h</i> ≤ 13<br>-18 ≤ <i>k</i> ≤ 18<br>-19 ≤ <i>l</i> ≤ 18                                              | -31 ≤ <i>h</i> ≤ 22<br>-47 ≤ <i>k</i> ≤ 47<br>-14 ≤ <i>l</i> ≤ 12                                               |
| data/restraints/parameters                 | 9052/1306/608                                                                                                 | 9128/1444/524                                                                                                  | 10952/32/587                                                                                                    |

\* To whom correspondence should be addressed. Email: yaomx@njtech.edu.cn; Fax: +86-25-58139528.

\* To whom correspondence should be addressed. Email: 221001007@njnu.edu.cn.

|                                      |                |                |                |
|--------------------------------------|----------------|----------------|----------------|
| GOF ( $F^2$ )                        | 1.086          | 1.116          | 1.087          |
| $R_I^a, wR_2^b$ ( $I > 2\sigma(I)$ ) | 0.0554, 0.1535 | 0.0876, 0.2399 | 0.0510, 0.0936 |
| $R_I^a, wR_2^b$ (all data)           | 0.0682, 0.1643 | 0.1075, 0.2589 | 0.0844, 0.1103 |

$$R_I^a = \Sigma||F_o| - |F_c||/\Sigma F_o| \quad wR_2^b = [\Sigma w(F_o^2 - F_c^2)^2/\Sigma w(F_o^2)^2]^{1/2}$$

| complexes                                  | 4                                                                                                 | 5                                                                   |
|--------------------------------------------|---------------------------------------------------------------------------------------------------|---------------------------------------------------------------------|
| molecular formula                          | C <sub>169</sub> H <sub>132</sub> Cl <sub>4</sub> Dy <sub>4</sub> N <sub>12</sub> O <sub>12</sub> | C <sub>47</sub> H <sub>38</sub> ClDyN <sub>4</sub> O <sub>3</sub> P |
| formular weight                            | 3375.59                                                                                           | 936.74                                                              |
| crystal system                             | Triclinic                                                                                         | Monoclinic                                                          |
| space group                                | <i>P</i> -1                                                                                       | <i>P</i> 2 <sub>1</sub> / <i>c</i>                                  |
| <i>a</i> , Å                               | 11.2499(16)                                                                                       | 12.1506(3)                                                          |
| <i>b</i> , Å                               | 18.894(2)                                                                                         | 10.3478(3)                                                          |
| <i>c</i> , Å                               | 36.404(5)                                                                                         | 33.4047(8)                                                          |
| <i>a</i> , deg                             | 83.682(4)                                                                                         | 90                                                                  |
| <i>β</i> , deg                             | 84.689(5)                                                                                         | 98.1990(10)                                                         |
| <i>γ</i> , deg                             | 78.406(5)                                                                                         | 90                                                                  |
| <i>V</i> , Å <sup>3</sup>                  | 7514.3(17)                                                                                        | 4157.11(19)                                                         |
| <i>Z</i>                                   | 2                                                                                                 | 4                                                                   |
| $\rho_{\text{calcd}}$ , g cm <sup>-3</sup> | 1.492                                                                                             | 1.497                                                               |
| <i>T</i> / K                               | 273.15                                                                                            | 193                                                                 |
| $\mu$ , mm <sup>-1</sup>                   | 2.123                                                                                             | 10.938                                                              |
| $\theta$ , deg                             | 2.822 to 26.000                                                                                   | 2.673 to 68.410                                                     |
| <i>F</i> (000)                             | 3374                                                                                              | 1884                                                                |
|                                            | -13 ≤ <i>h</i> ≤ 13                                                                               | -14 ≤ <i>h</i> ≤ 14                                                 |
| index ranges                               | -23 ≤ <i>k</i> ≤ 23                                                                               | -12 ≤ <i>k</i> ≤ 12                                                 |
|                                            | -44 ≤ <i>l</i> ≤ 44                                                                               | -29 ≤ <i>l</i> ≤ 40                                                 |
| data/restraints/parameters                 | 28941/547/1894                                                                                    | 7591 / 146 / 558                                                    |
| GOF ( $F^2$ )                              | 1.062                                                                                             | 1.053                                                               |
| $R_I^a, wR_2^b$ ( $I > 2\sigma(I)$ )       | 0.0548, 0.0876                                                                                    | 0.0369, 0.0968                                                      |
| $R_I^a, wR_2^b$ (all data)                 | 0.0916, 0.0947                                                                                    | 0.0442, 0.1010                                                      |

$$R_I^a = \Sigma||F_o| - |F_c||/\Sigma F_o| \quad wR_2^b = [\Sigma w(F_o^2 - F_c^2)^2/\Sigma w(F_o^2)^2]^{1/2}$$

Table S2 Selected bond lengths (Å) and angles (°) for complex 1.

|             |          |              |          |
|-------------|----------|--------------|----------|
| Dy(1)-Cl(1) | 2.627(2) | Dy(1)-N(1)   | 2.480(5) |
| Dy(1)-N(3A) | 2.513(4) | Dy(1)-O(1A)  | 2.339(4) |
| Dy(1)-O(1)  | 2.305(4) | Dy(1)-O(2)   | 2.172(4) |
| Dy(1)-O(3)  | 2.234(5) | Dy(1)-Dy(1A) | 3.866(5) |

|                   |            |                   |            |
|-------------------|------------|-------------------|------------|
| N(1)-Dy(1)-Cl(1)  | 93.71(14)  | N(1)-Dy(1)-N(3A)  | 162.20(15) |
| N(3A)-Dy(1)-Cl(1) | 89.05(12)  | O(1A)-Dy(1)-Cl(1) | 93.86(13)  |
| O(1)-Dy(1)-Cl(1)  | 94.95(14)  | O(1)-Dy(1)-N(1)   | 64.80(13)  |
| O(1A)-Dy(1)-N(1)  | 131.93(14) | O(1)-Dy(1)-N(3A)  | 132.51(13) |
| O(1A)-Dy(1)-N(3A) | 65.24(14)  | O(1)-Dy(1)-O(1A)  | 67.28(15)  |
| O(2)-Dy(1)-Cl(1)  | 91.61(14)  | O(2)-Dy(1)-N(1)   | 74.89(14)  |
| O(2)-Dy(1)-N(3A)  | 87.47(14)  | O(2)-Dy(1)-O(1)   | 139.46(13) |
| O(2)-Dy(1)-O(1A)  | 152.01(14) | O(2)-Dy(1)-O(3)   | 87.44(19)  |
| O(3)-Dy(1)-Cl(1)  | 176.63(14) | O(3)-Dy(1)-N(1)   | 89.18(18)  |
| O(3)-Dy(1)-N(3A)  | 87.67(17)  | O(3)-Dy(1)-O(1A)  | 85.49(18)  |
| O(3)-Dy(1)-O(1)   | 87.86(18)  | Dy(1)-O(1)-Dy(1A) | 112.72(15) |

Symmetry transformations used to generate equivalent atoms: A -x+1,-y+1,-z+2

Table S3 Selected bond lengths (Å) and angles (°) for complex **2**.

|                   |           |                   |           |
|-------------------|-----------|-------------------|-----------|
| Dy(1)-Cl(1)       | 2.636(3)  | Dy(1)-N(1)        | 2.474(8)  |
| Dy(1)-N(3A)       | 2.507(8)  | Dy(1)-O(1)        | 2.302(6)  |
| Dy(1)-O(1A)       | 2.350(6)  | Dy(1)-O(2)        | 2.170(7)  |
| Dy(1)-O(3)        | 2.272(7)  | Dy(1)-Dy(1A)      | 3.890(8)  |
| N(1)-Dy(1)-Cl(1)  | 95.4(2)   | N(1)-Dy(1)-N(3A)  | 163.1(3)  |
| N(3A)-Dy(1)-Cl(1) | 86.6(2)   | O(1)-Dy(1)-Cl(1)  | 96.85(17) |
| O(1A)-Dy(1)-Cl(1) | 91.35(17) | O(1A)-Dy(1)-N(1)  | 131.1(2)  |
| O(1)-Dy(1)-N(1)   | 64.6(2)   | O(1A)-Dy(1)-N(3A) | 65.5(2)   |
| O(1)-Dy(1)-N(3A)  | 131.9(2)  | O(1)-Dy(1)-O(1A)  | 66.5(2)   |
| O(2)-Dy(1)-Cl(1)  | 90.3(2)   | O(2)-Dy(1)-N(1)   | 74.8(3)   |
| O(2)-Dy(1)-N(3A)  | 88.4(3)   | O(2)-Dy(1)-O(1A)  | 153.6(3)  |
| O(2)-Dy(1)-O(1)   | 139.3(2)  | O(2)-Dy(1)-O(3)   | 86.4(3)   |
| O(3)-Dy(1)-Cl(1)  | 171.7(2)  | O(3)-Dy(1)-N(1)   | 91.1(3)   |
| O(3)-Dy(1)-N(3A)  | 85.7(3)   | O(3)-Dy(1)-O(1)   | 90.5(3)   |
| O(3)-Dy(1)-O(1A)  | 88.2(3)   | Dy(1)-O(1)-Dy(1A) | 113.5(2)  |

Symmetry transformations used to generate equivalent atoms: A -x+1,-y+1,-z+2

Table S4 Selected bond lengths (Å) and angles (°) for complex **3**.

|                   |            |                  |            |
|-------------------|------------|------------------|------------|
| Dy(1)-Cl(1)       | 2.619(1)   | Dy(1)-O(1)       | 2.298(3)   |
| Dy(1)-O(1A)       | 2.338(3)   | Dy(1)-O(2)       | 2.181(3)   |
| Dy(1)-O(3)        | 2.259(3)   | Dy(1)-N(1A)      | 2.524(4)   |
| Dy(1)-N(3)        | 2.475(4)   | Dy(1)-Dy(1A)     | 3.868(4)   |
| O(1)-Dy(1)-Cl(1)  | 92.87(9)   | O(1)-Dy(1)-O(1A) | 66.86(12)  |
| O(A1)-Dy(1)-N(1A) | 65.44(11)  | O(1)-Dy(1)-N(1A) | 132.16(11) |
| O(1A)-Dy(1)-N(3)  | 131.66(11) | O(1)-Dy(1)-N(3)  | 65.06(11)  |

|                   |            |                   |            |
|-------------------|------------|-------------------|------------|
| O(1A)-Dy(1)-Cl(1) | 88.67(9)   | O(2)-Dy(1)-Cl(1)  | 90.73(10)  |
| O(2)-Dy(1)-O(1A)  | 153.70(11) | O(2)-Dy(1)-O(1)   | 139.41(11) |
| O(2)-Dy(1)-O(3)   | 88.65(12)  | O(2)-Dy(1)-N(1A)  | 88.27(12)  |
| O(2)-Dy(1)-N(3)   | 74.60(12)  | O(3)-Dy(1)-N(3)   | 96.51(12)  |
| O(3)-Dy(1)-Cl(1)  | 174.15(9)  | O(3)-Dy(1)-O(1)   | 91.38(11)  |
| O(3)-Dy(1)-O(1A)  | 89.31(11)  | O(3)-Dy(1)-N(1A)  | 84.70(12)  |
| N(1A)-Dy(1)-Cl(1) | 89.48(9)   | N(3)-Dy(1)-N(1A)  | 162.77(12) |
| N(3)-Dy(1)-Cl(1)  | 88.93(10)  | Dy(1)-O(1)-Dy(1A) | 113.14(12) |

Symmetry transformations used to generate equivalent atoms: A -x+1, -y+1, -z+1

Table S5 Selected bond lengths (Å) and angles (°) for complex **4**.

|                   |            |                  |            |
|-------------------|------------|------------------|------------|
| Dy(1)-Cl(2)       | 2.578(2)   | Dy(1)-O(1)       | 2.155(4)   |
| Dy(1)-O(2)        | 2.297(4)   | Dy(1)-O(3)       | 2.335(4)   |
| Dy(1)-N(1)        | 2.468(5)   | Dy(1)-N(6)       | 2.521(5)   |
| Dy(1)-O(12)       | 2.373(4)   | Dy(2)-Cl(1)      | 2.655(2)   |
| Dy(2)-O(2)        | 2.350(3)   | Dy(2)-O(3)       | 2.303(3)   |
| Dy(2)-O(4)        | 2.164(4)   | Dy(2)-O(9)       | 2.277(4)   |
| Dy(2)-N(3)        | 2.527(5)   | Dy(2)-N(4)       | 2.450(4)   |
| Dy(3)-Cl(3)       | 2.660(2)   | Dy(3)-O(5)       | 2.175(4)   |
| Dy(3)-O(6)        | 2.315(4)   | Dy(3)-O(7)       | 2.327(4)   |
| Dy(3)-O(11)       | 2.272(5)   | Dy(3)-N(7)       | 2.454(5)   |
| Dy(3)-N(10)       | 2.519(5)   | Dy(4)-Cl(4)      | 2.571(2)   |
| Dy(4)-O(6)        | 2.328(4)   | Dy(4)-O(7)       | 2.303(4)   |
| Dy(4)-O(8)        | 2.167(4)   | Dy(4)-O(10)      | 2.405(5)   |
| Dy(4)-N(9)        | 2.535(5)   | Dy(4)-N(12)      | 2.467(5)   |
| O(1)-Dy(1)-Cl(2)  | 93.49(12)  | O(1)-Dy(1)-O(2)  | 138.37(13) |
| O(1)-Dy(1)-O(3)   | 149.55(14) | O(1)-Dy(1)-N(1)  | 74.37(15)  |
| O(1)-Dy(1)-N(6)   | 87.35(14)  | O(1)-Dy(1)-O(12) | 86.24(16)  |
| O(2)-Dy(1)-Cl(2)  | 102.34(11) | O(2)-Dy(1)-O(3)  | 66.78(12)  |
| O(2)-Dy(1)-N(1)   | 64.48(14)  | O(2)-Dy(1)-N(6)  | 131.75(13) |
| O(2)-Dy(1)-O(12)  | 84.60(15)  | O(3)-Dy(1)-Cl(2) | 96.44(10)  |
| O(3)-Dy(1)-N(1)   | 129.84(14) | O(3)-Dy(1)-N(6)  | 65.02(13)  |
| O(3)-Dy(1)-O(12)  | 78.88(14)  | N(1)-Dy(1)-Cl(2) | 104.59(12) |
| N(1)-Dy(1)-N(6)   | 159.63(15) | N(6)-Dy(1)-Cl(2) | 85.10(12)  |
| O(12)-Dy(1)-Cl(2) | 169.47(13) | O(12)-Dy(1)-N(1) | 85.50(17)  |
| O(12)-Dy(1)-N(6)  | 84.37(17)  | O(2)-Dy(2)-Cl(1) | 85.82(10)  |
| O(2)-Dy(2)-N(3)   | 65.23(13)  | O(2)-Dy(2)-N(4)  | 131.34(13) |
| O(3)-Dy(2)-Cl(1)  | 87.29(10)  | O(3)-Dy(2)-O(2)  | 66.44(12)  |
| O(3)-Dy(2)-N(3)   | 131.63(14) | O(3)-Dy(2)-N(4)  | 65.06(14)  |

|                   |            |                   |            |
|-------------------|------------|-------------------|------------|
| O(4)-Dy(2)-Cl(1)  | 98.26(12)  | O(4)-Dy(2)-O(2)   | 152.45(14) |
| O(4)-Dy(2)-O(3)   | 140.67(13) | O(4)-Dy(2)-O(9)   | 90.07(16)  |
| O(4)-Dy(2)-N(3)   | 87.38(15)  | O(4)-Dy(2)-N(4)   | 75.64(14)  |
| O(9)-Dy(2)-Cl(1)  | 171.47(11) | O(9)-Dy(2)-O(2)   | 85.94(14)  |
| O(9)-Dy(2)-O(3)   | 87.42(14)  | O(9)-Dy(2)-N(3)   | 87.35(15)  |
| O(9)-Dy(2)-N(4)   | 88.24(15)  | N(3)-Dy(2)-Cl(1)  | 91.17(12)  |
| N(4)-Dy(2)-Cl(1)  | 95.57(12)  | N(4)-Dy(2)-N(3)   | 162.45(15) |
| O(5)-Dy(3)-Cl(3)  | 96.71(13)  | O(5)-Dy(3)-O(6)   | 140.40(14) |
| O(5)-Dy(3)-O(7)   | 152.93(15) | O(5)-Dy(3)-O(11)  | 88.90(18)  |
| O(5)-Dy(3)-N(7)   | 75.63(15)  | O(5)-Dy(3)-N(10)  | 86.96(16)  |
| O(6)-Dy(3)-Cl(3)  | 88.44(12)  | O(6)-Dy(3)-O(7)   | 66.52(14)  |
| O(6)-Dy(3)-N(7)   | 64.77(14)  | O(6)-Dy(3)-N(10)  | 132.33(15) |
| O(7)-Dy(3)-Cl(3)  | 84.86(12)  | O(7)-Dy(3)-N(7)   | 131.20(15) |
| O(7)-Dy(3)-N(10)  | 65.97(15)  | O(11)-Dy(3)-Cl(3) | 172.69(13) |
| O(11)-Dy(3)-O(6)  | 90.21(16)  | O(11)-Dy(3)-O(7)  | 88.02(17)  |
| O(11)-Dy(3)-N(7)  | 89.44(17)  | O(11)-Dy(3)-N(10) | 84.46(17)  |
| N(7)-Dy(3)-Cl(3)  | 96.47(13)  | N(7)-Dy(3)-N(10)  | 161.67(16) |
| N(10)-Dy(3)-Cl(3) | 91.14(13)  | O(6)-Dy(4)-Cl(4)  | 95.37(12)  |
| O(6)-Dy(4)-O(10)  | 78.56(16)  | O(6)-Dy(4)-N(9)   | 65.43(15)  |
| O(6)-Dy(4)-N(12)  | 130.30(15) | O(7)-Dy(4)-Cl(4)  | 96.00(13)  |
| O(7)-Dy(4)-O(6)   | 66.69(13)  | O(7)-Dy(4)-O(10)  | 84.77(17)  |
| O(7)-Dy(4)-N(9)   | 132.09(15) | O(7)-Dy(4)-N(12)  | 64.72(15)  |
| O(8)-Dy(4)-Cl(4)  | 96.61(16)  | O(8)-Dy(4)-O(6)   | 149.62(16) |
| O(8)-Dy(4)-O(7)   | 139.01(15) | O(8)-Dy(4)-O(10)  | 87.2(2)    |
| O(8)-Dy(4)-N(9)   | 86.71(16)  | O(8)-Dy(4)-N(12)  | 74.81(16)  |
| O(10)-Dy(4)-Cl(4) | 173.05(13) | O(10)-Dy(4)-N(9)  | 84.33(18)  |
| O(10)-Dy(4)-N(12) | 87.29(19)  | N(9)-Dy(4)-Cl(4)  | 90.09(14)  |
| N(12)-Dy(4)-Cl(4) | 99.30(15)  | N(12)-Dy(4)-N(9)  | 160.05(17) |
| Dy(1)-O(2)-Dy(2)  | 113.00(14) | Dy(2)-O(3)-Dy(1)  | 113.38(15) |
| Dy(3)-O(6)-Dy(4)  | 113.03(15) | Dy(4)-O(7)-Dy(3)  | 113.51(16) |

Table S6 Selected bond lengths (Å) and angles (°) for complex **5**.

|                   |            |                  |           |
|-------------------|------------|------------------|-----------|
| Dy(1)-N(1)        | 2.459(3)   | Dy(1)-N(3A)      | 2.536(3)  |
| Dy(1)-O(1A)       | 2.337(2)   | Dy(1)-O(1)       | 2.321(2)  |
| Dy(1)-O(2)        | 2.187(2)   | Dy(1)-O(3)       | 2.307(2)  |
| Dy(1)-Cl(1)       | 2.627(1)   | Dy(1)-Dy(1A)     | 3.902(4)  |
| N(1)-Dy(1)-N(3A)  | 163.31(10) | N(1)-Dy(1)-Cl(1) | 91.35(8)  |
| N(3A)-Dy(1)-Cl(1) | 91.52(7)   | O(1A)-Dy(1)-N(1) | 130.46(9) |

|                   |           |                   |            |
|-------------------|-----------|-------------------|------------|
| O(1)-Dy(1)-N(1)   | 64.31(9)  | O(1)-Dy(1)-N(3A)  | 131.89(9)  |
| O(1A)-Dy(1)-N(3A) | 65.96(9)  | O(1)-Dy(1)-O(1A)  | 66.16(10)  |
| O(1A)-Dy(1)-Cl(1) | 90.33(7)  | O(1)-Dy(1)-Cl(1)  | 93.22(7)   |
| O(2)-Dy(1)-N(1)   | 74.57(10) | O(2)-Dy(1)-N(3A)  | 88.80(9)   |
| O(2)-Dy(1)-O(1A)  | 154.43(9) | O(2)-Dy(1)-O(1)   | 138.27(9)  |
| O(2)-Dy(1)-O(3)   | 85.13(10) | O(2)-Dy(1)-Cl(1)  | 94.61(7)   |
| O(3)-Dy(1)-N(1)   | 99.66(11) | O(3)-Dy(1)-N(3A)  | 76.96(10)  |
| O(3)-Dy(1)-O(1A)  | 85.13(9)  | O(3)-Dy(1)-O(1)   | 94.61(9)   |
| O(3)-Dy(1)-Cl(1)  | 168.47(8) | Dy(1)-O(1)-Dy(1A) | 113.84(10) |

Symmetry transformations used to generate equivalent atoms: A -x+1,-y+1,-z+1

Table S7 Continuous Shape Measures (CShMs) of the coordination geometry for Dy<sup>III</sup> ion in all complexes. Below is the symmetry and description for each polyhedron.

| Complexes | Atoms | PBPY-7<br>( $D_{5h}$ ) | COC-7<br>( $C_{3v}$ ) | CTPR-7<br>( $C_{2v}$ ) | JPBPY-7<br>( $D_{5h}$ ) |
|-----------|-------|------------------------|-----------------------|------------------------|-------------------------|
| <b>1</b>  | Dy1   | <b>1.288</b>           | 7.571                 | 6.224                  | 5.448                   |
| <b>2</b>  | Dy1   | <b>1.448</b>           | 7.453                 | 5.985                  | 5.736                   |
| <b>3</b>  | Dy1   | <b>1.236</b>           | 6.896                 | 5.568                  | 5.440                   |
|           | Dy1   | <b>1.839</b>           | 6.984                 | 6.247                  | 6.352                   |
| <b>4</b>  | Dy2   | <b>1.127</b>           | 7.999                 | 6.392                  | 5.529                   |
|           | Dy3   | <b>1.200</b>           | 7.722                 | 6.045                  | 5.620                   |
|           | Dy4   | <b>1.373</b>           | 7.240                 | 6.222                  | 6.062                   |
| <b>5</b>  | Dy1   | <b>1.704</b>           | 7.313                 | 5.643                  | 5.979                   |

PBPY-7 = Pentagonal bipyramid

COC-7 = Capped octahedron

CTPR-7 = Capped trigonal prism

JPBPY-7 = Johnson pentagonal bipyramid J13

Table S8 Magnetic relaxation parameters obtained by fitting the plot of  $\ln\tau \sim T^{-1}$ .

| Complex  | $U_{\text{eff}}/\text{K}$ | $\tau_0/\text{s}$     | $C/\text{s}^{-1}\cdot\text{K}^{-n}$ | $n$  | $\tau_{\text{QTM}}/\text{s}$ | adjusted $R^2$ |
|----------|---------------------------|-----------------------|-------------------------------------|------|------------------------------|----------------|
| <b>1</b> | 45.76                     | $2.16 \times 10^{-5}$ | 0.34                                | 3.56 | 0.0096                       | 0.99994        |
| <b>2</b> | 44.49                     | $3.19 \times 10^{-5}$ | 2.19                                | 2.26 | 0.0159                       | 0.99985        |
| <b>3</b> | 66.49                     | $5.56 \times 10^{-6}$ | 1.34                                | 2.80 | 0.0338                       | 0.99984        |
| <b>4</b> | 70.00                     | $3.73 \times 10^{-6}$ | 0.52                                | 2.89 | 0.1018                       | 0.99956        |
| <b>5</b> | 63.13                     | $1.53 \times 10^{-5}$ | 0.08                                | 3.71 | 0.1329                       | 0.99998        |

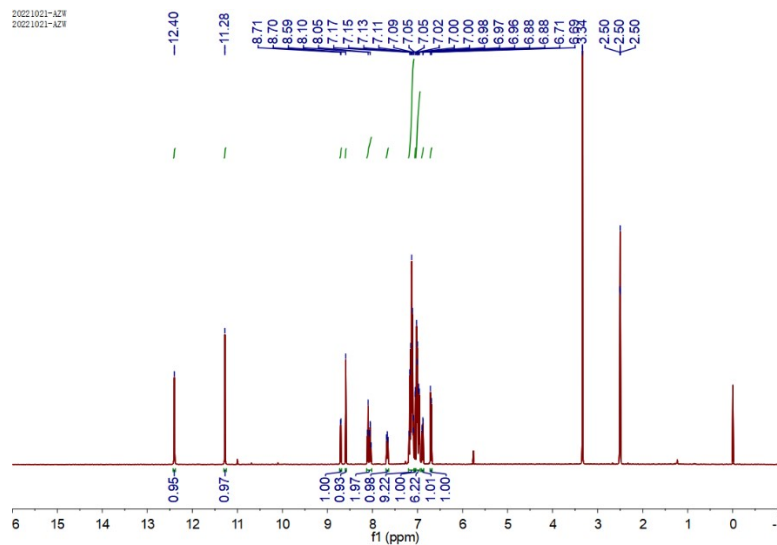

Fig. S1 <sup>1</sup>H NMR spectra of the H<sub>2</sub>TPE-pc ligand.

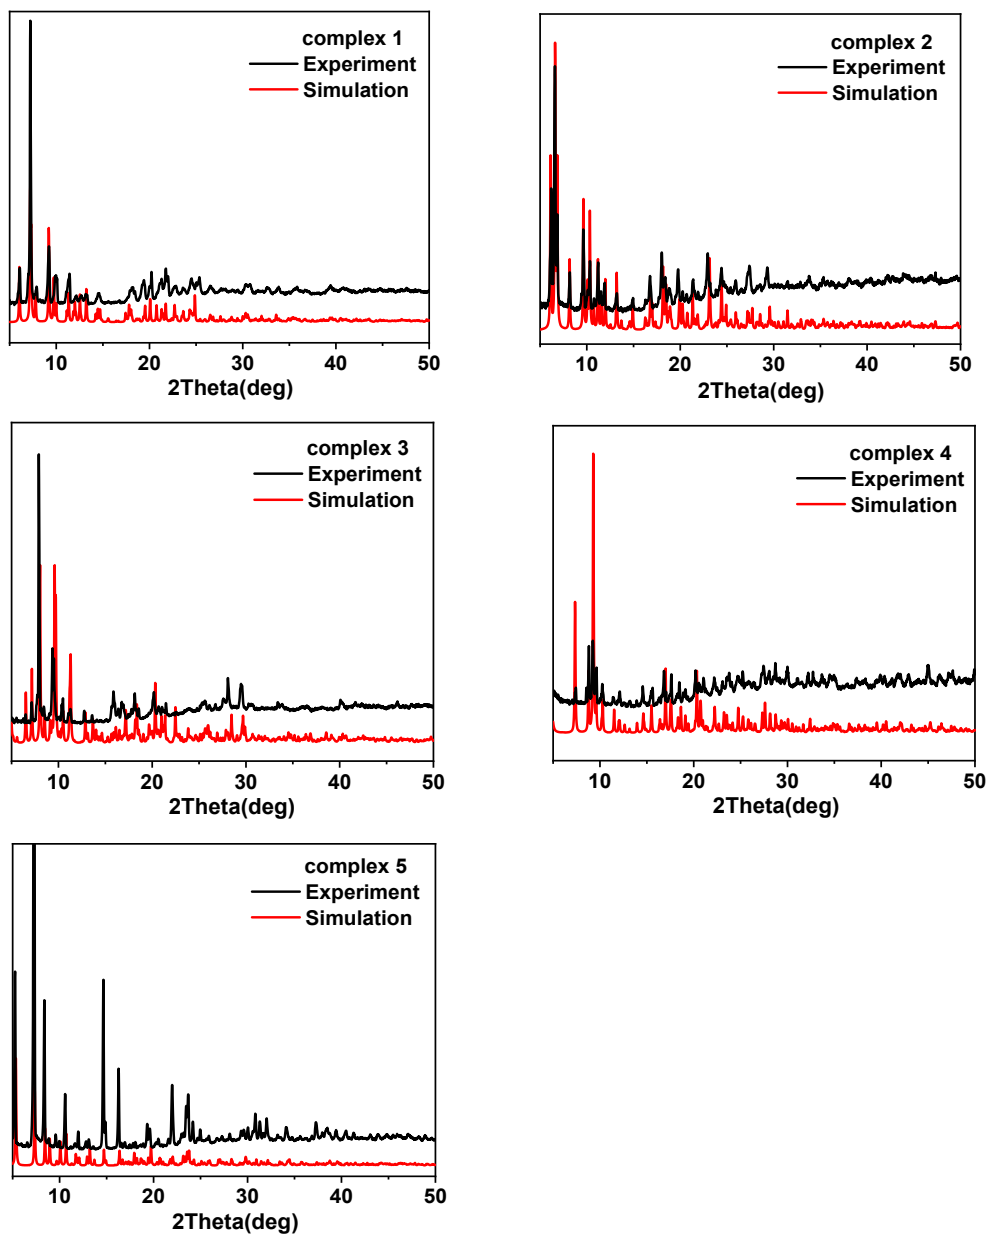

Fig. S2 PXRD patterns for all complexes.

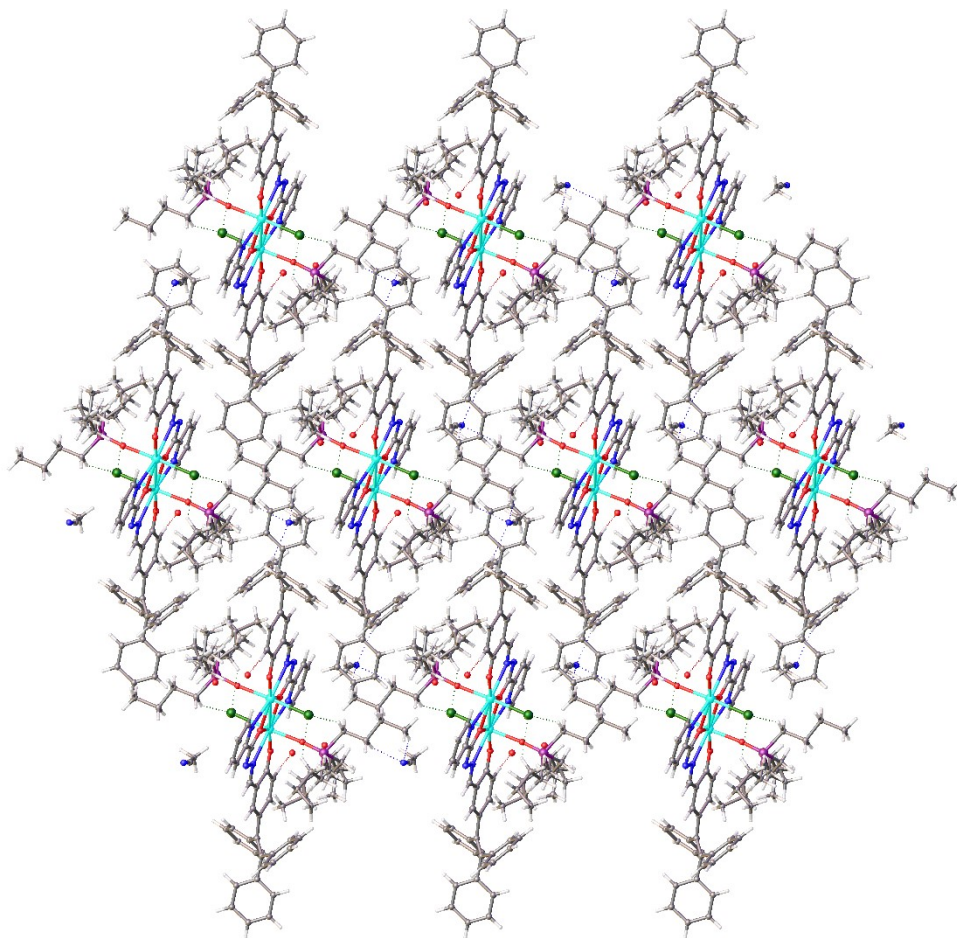

Fig. S3 A view showing 3D structure formed by weak C-H...Cl and C-H...N H-bond interactions and van der Waals forces in **1**.



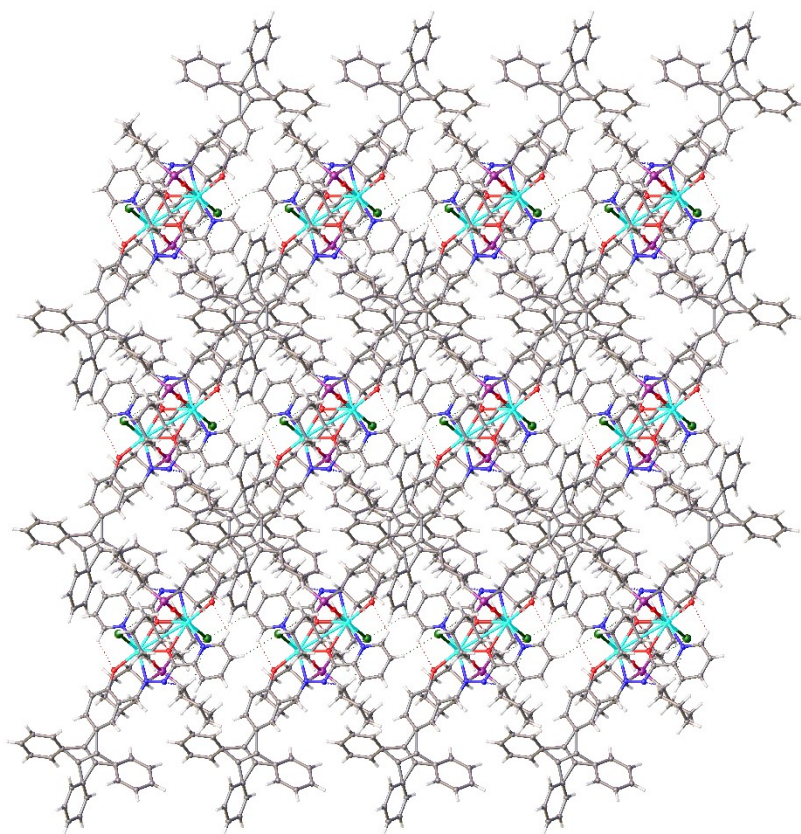

Fig. S4 A view showing 3D structure formed by weak C-H...O and C-H...Cl H-bond interactions and van der Waals forces in **2**.

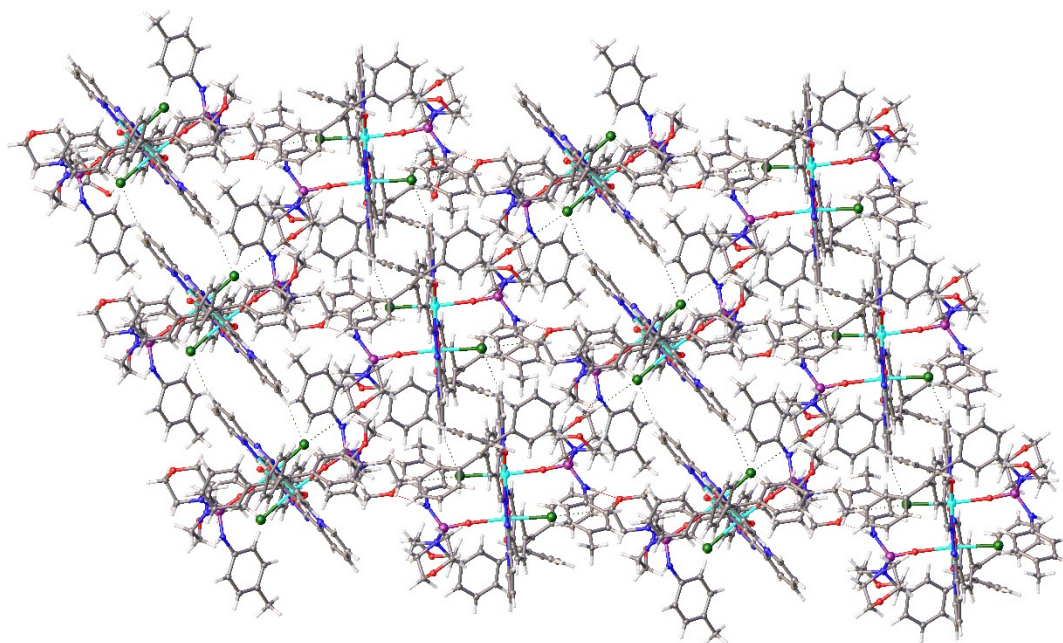

Fig. S5 A view showing 3D structure formed by weak C-H...Cl, N-H...O and  $\pi$ ... $\pi$  interactions in **3**.

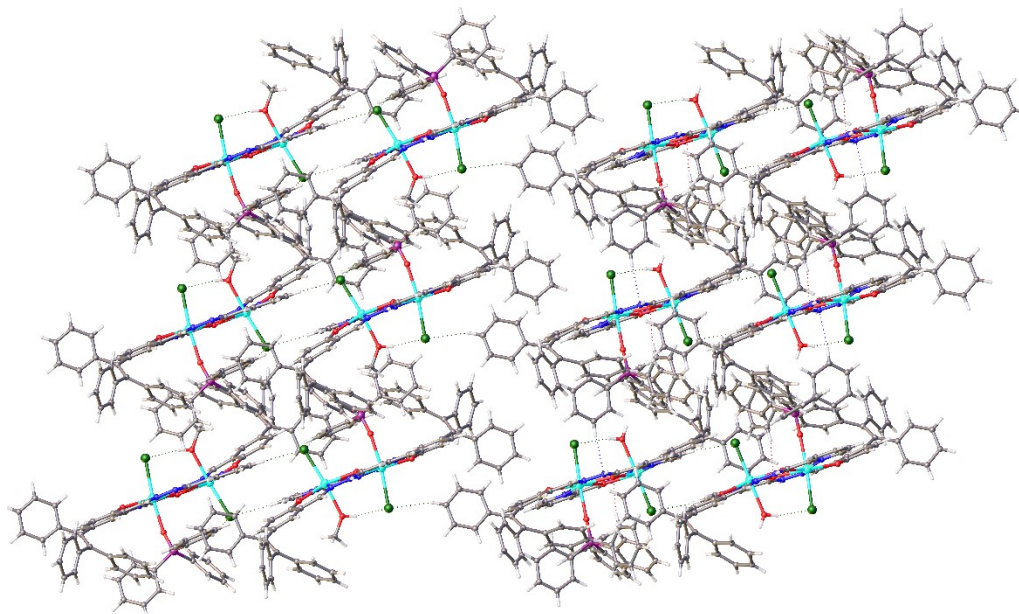

Fig. S6 A view showing 3D structure formed by weak C-H...Cl, C-H...N, O-H...Cl interactions in 4.

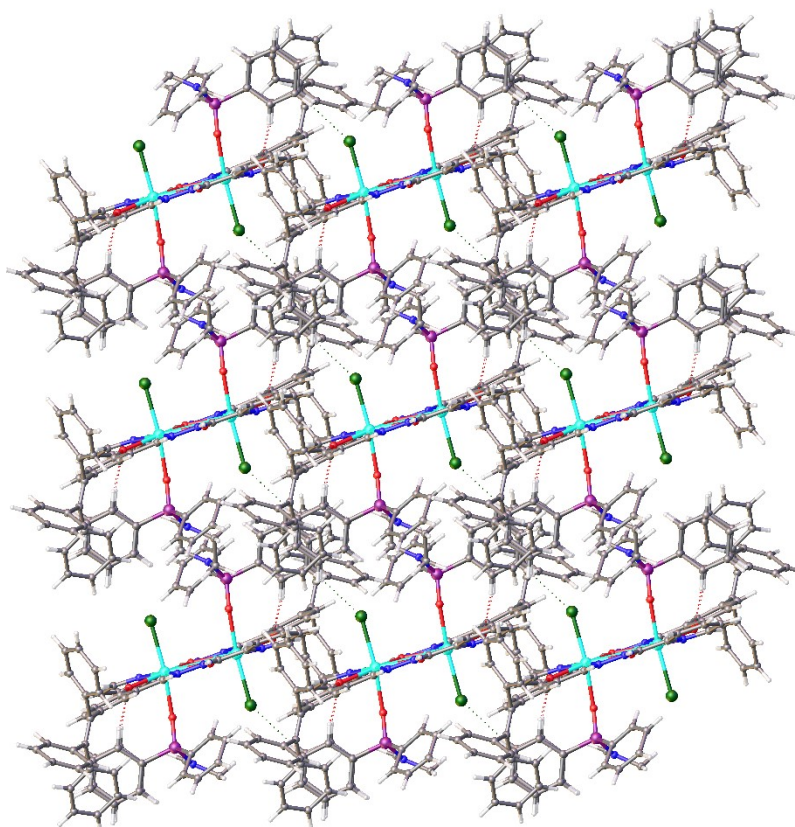

Fig. S7 A view showing 3D structure formed by weak C-H...Cl, C-H...O and  $\pi$ ... $\pi$  interactions in 5.

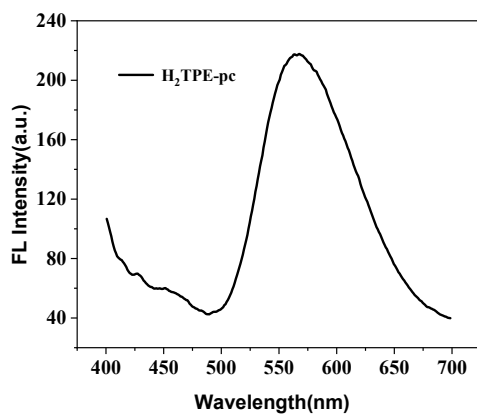

Fig. S8 The solid-state emission spectra of the H<sub>2</sub>TPE-pc ligand at room temperature.

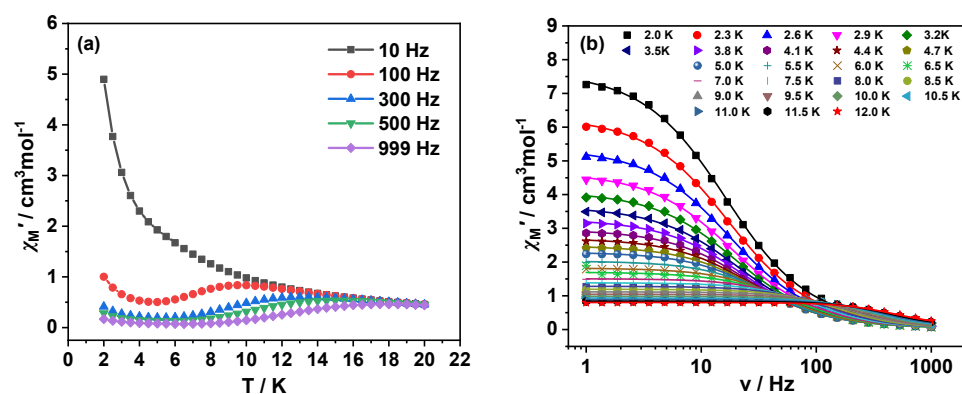

Fig. S9 Temperature (a) and frequency (b) dependence of the in-of-phase ( $\chi'$ ) ac susceptibility signals for **1** under a zero-dc field. In figure (a), the solid lines are a guide for the eye. In figure (b), the solid lines are the best fit using the Debye model.

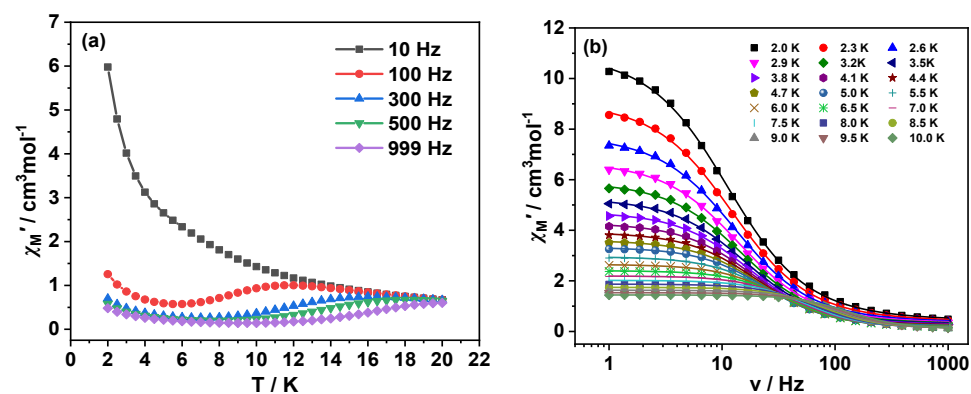

Fig. S10 Temperature (a) and frequency (b) dependence of the in-of-phase ( $\chi'$ ) ac susceptibility signals for **2** under a zero-dc field. In figure (a), the solid lines are a guide for the eye. In figure (b), the solid lines are the best fit using the Debye model.

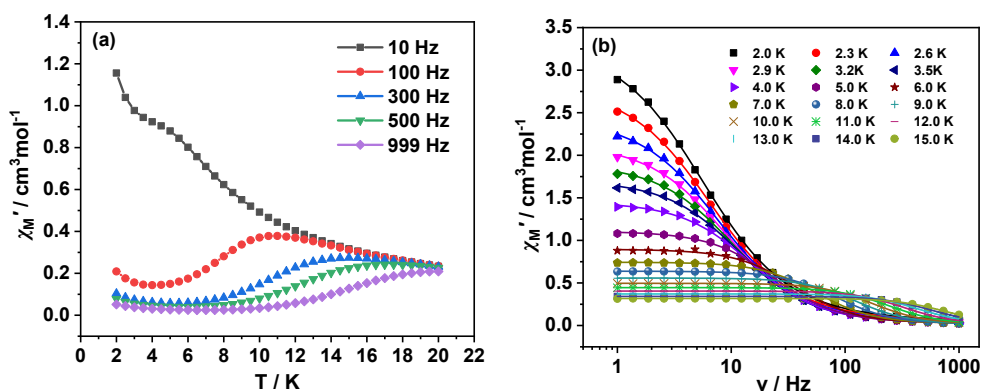

Fig. S11 Temperature(a) and frequency (b) dependence of the in-of-phase ( $\chi'$ ) ac susceptibility signals for **3** under a zero-dc field. In figure (a), the solid lines are a guide for the eye. In figure (b), the solid lines are the best fit using the Debye model.

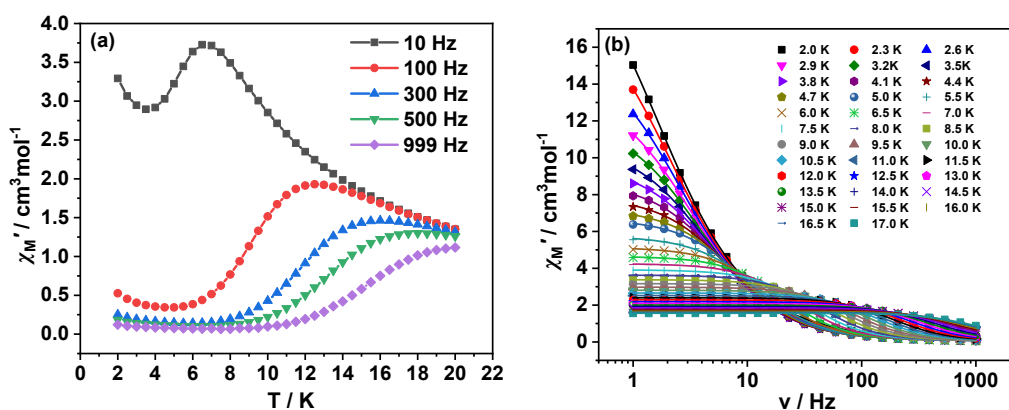

Fig. S12 Temperature(a) and frequency (b) dependence of the in-of-phase ( $\chi'$ ) ac susceptibility signals for **4** under a zero-dc field. In figure (a), the solid lines are a guide for the eye. In figure (b), the solid lines are the best fit using the Debye model.

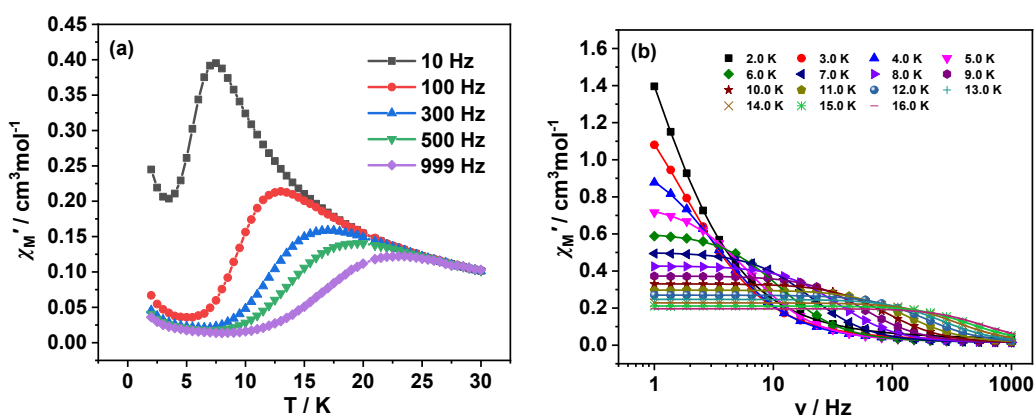

Fig. S13 Temperature(a) and frequency (b) dependence of the in-of-phase ( $\chi'$ ) ac susceptibility signals for **5** under a zero-dc field. In figure (a), the solid lines are a guide for the eye. In figure (b), the solid lines are the best fit using the Debye model.

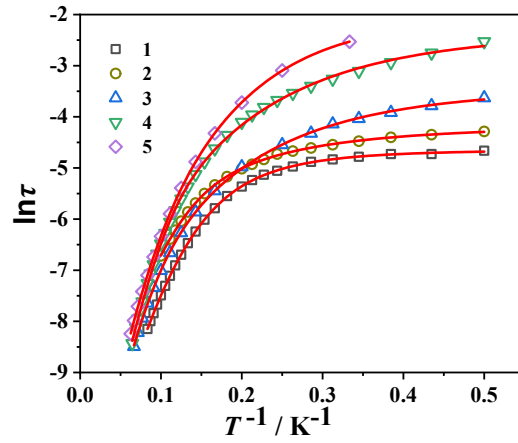

Fig. S14 Relaxation data plotted as  $\ln(\tau)$  vs.  $T^{-1}$  for 1-5. The red solid lines represent the best fits of experimental data based on Orbach, Raman and QTM processes.

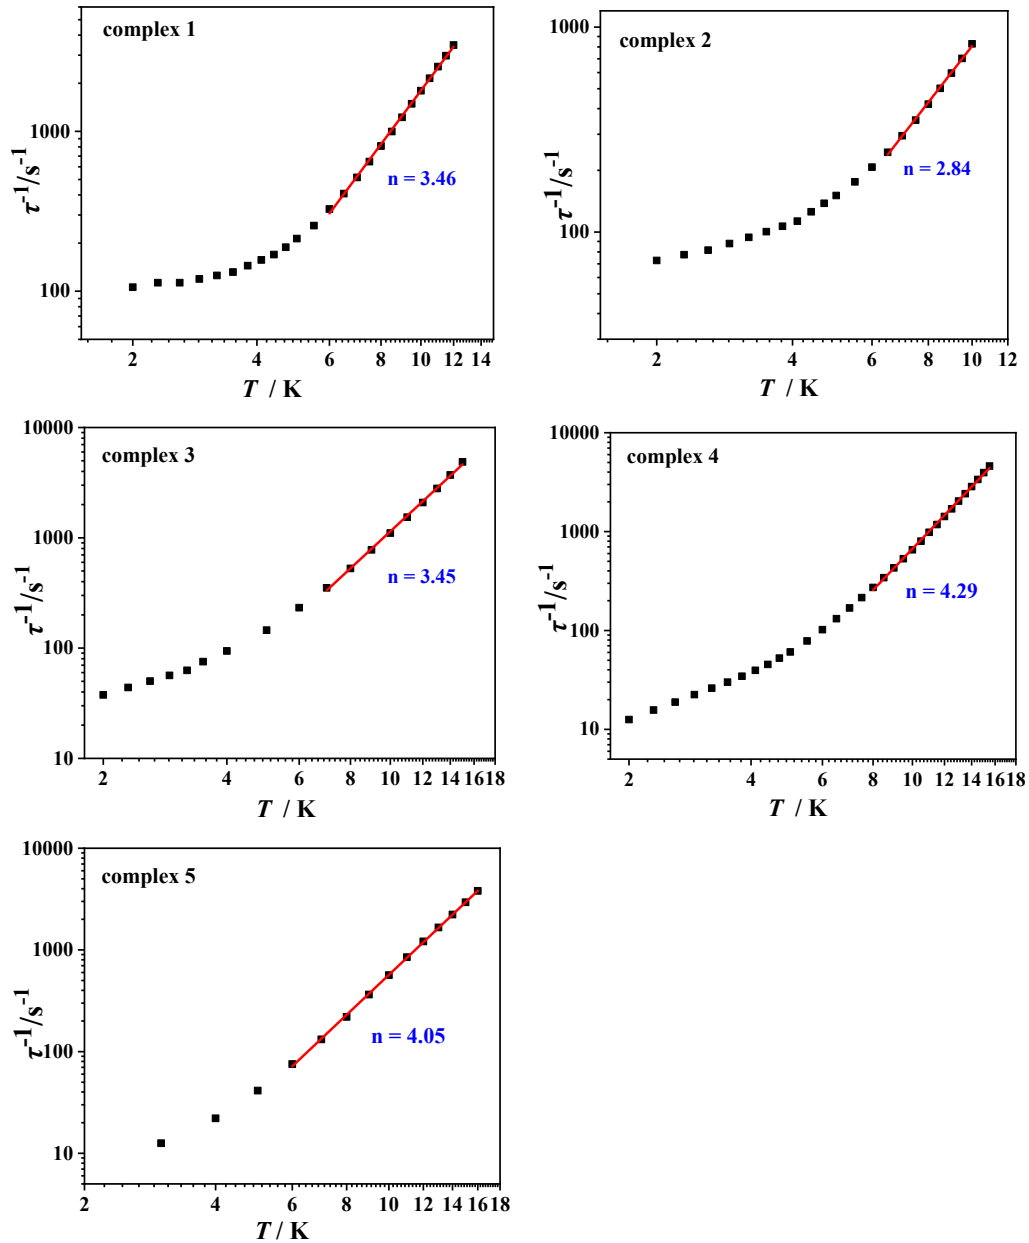

Fig. S15 Temperature-dependent relaxation times of **1-5** (log-log scale) under zero dc field. The lines were fitted to the equation of  $\tau^{-1} = T^n$  to give  $n$  values.

## Computational details

For binuclear complexes **1-3** and **5**, we only need to calculate one individual Dy<sup>III</sup> fragment (**1\_Dy1**, **2\_Dy1**, **3\_Dy1** and **5\_Dy1**) respectively due to the centrosymmetric structure. But for complex **4**, which is also binucleated, we need to consider two molecular structures (**4-1**, **4-2**), each of which is not centrally symmetric, so four Dy<sup>III</sup> fragments (**4\_Dy1**, **4\_Dy2**, **4\_Dy3** and **4\_Dy4**) need to be calculated (see Figure S15). Complete-active-space self-consistent field (CASSCF) calculations on individual Dy<sup>III</sup> fragments have been carried out with the OpenMolcas<sup>S1</sup> program package. Each of individual Dy<sup>III</sup> fragments in complexes was calculated keeping the experimentally determined structures of the corresponding compounds while replacing the other Dy<sup>III</sup> ions with diamagnetic Lu<sup>III</sup>.

The basis sets for all atoms are atomic natural orbitals from the ANO-RCC library: ANO-RCC-VTZP for Dy<sup>III</sup>; VTZ for close N and O; VDZ for distant atoms. The calculations employed the second order Douglas-Kroll-Hess Hamiltonian, where scalar relativistic contractions were taken into account in the basis set and the spin-orbit couplings were handled separately in the restricted active space state interaction (RASSI-SO) procedure.<sup>S2,S3</sup> For each individual Dy<sup>III</sup> fragment, active electrons in 7 active orbitals include all  $f$  electrons (CAS(9 in 7 for Dy<sup>III</sup>)) in the CASSCF calculation. To exclude all the doubts, we calculated all the roots in the active space. We have mixed the maximum number of spin-free state which was possible with our hardware (all from 21 sextets, 128 from 224 quadruplets, 130 from 490 doublets) for each fragment. The SINGLE\_ANISO<sup>S4-S6</sup> program was used to obtain the energy levels,  $g$  tensors, magnetic axes, *et al.* based on the above CASSCF/RASSI-SO calculations.

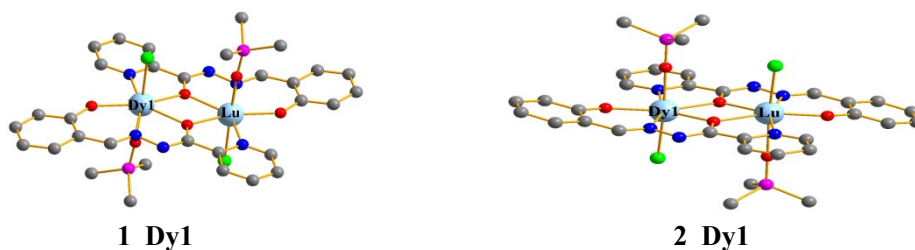

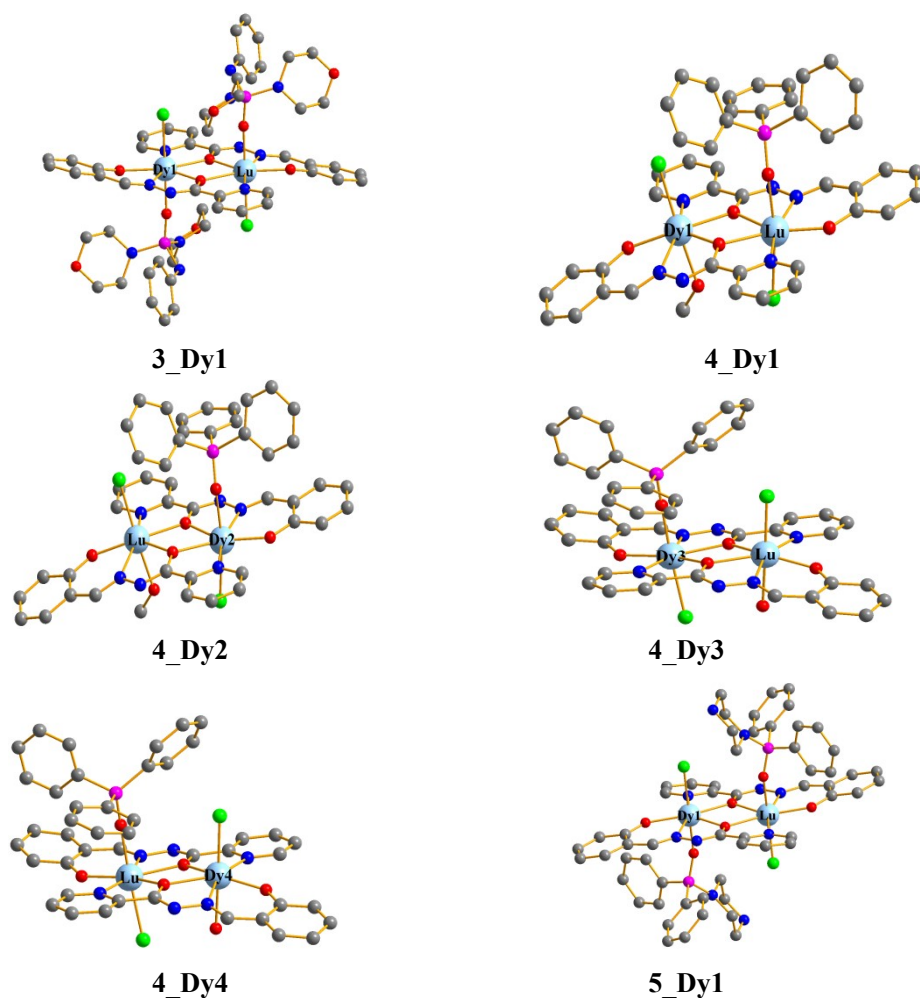

Fig. S16 Calculated model structures of individual Dy<sup>III</sup> fragments of complexes **1–5**; H atoms are omitted for clarity.

Table S9. Calculated energy levels (cm<sup>-1</sup>), **g** ( $g_x, g_y, g_z$ ) tensors and predominant  $m_J$  values of the lowest eight Kramers doublets (KDs) of individual Dy<sup>III</sup> fragments for complexes **1–5** using CASSCF/RASSI-SO with the OpenMolcas.

| KDs | <b>1_Dy1</b> |                          |       | <b>2_Dy1</b> |                          |       | <b>3_Dy1</b> |                          |       |
|-----|--------------|--------------------------|-------|--------------|--------------------------|-------|--------------|--------------------------|-------|
|     | $E$          | <b>g</b>                 | $m_J$ | $E$          | <b>g</b>                 | $m_J$ | $E$          | <b>g</b>                 | $m_J$ |
| 1   | 0.0          | 0.001<br>0.008<br>19.668 | ±15/2 | 0.0          | 0.001<br>0.005<br>19.697 | ±15/2 | 0.0          | 0.007<br>0.014<br>19.681 | ±15/2 |
| 2   | 194.3        | 0.267<br>0.342<br>16.970 | ±13/2 | 200.9        | 0.176<br>0.196<br>17.142 | ±13/2 | 195.3        | 0.180<br>0.239<br>17.037 | ±13/2 |
| 3   | 298.8        | 1.118<br>1.408<br>18.329 | ±1/2  | 350.4        | 2.068<br>3.962<br>15.422 | ±3/2  | 317.3        | 1.292<br>1.705<br>17.988 | ±1/2  |
| 4   | 376.0        | 2.962<br>5.713<br>10.229 | ±11/2 | 394.8        | 8.184<br>6.308<br>0.213  | ±11/2 | 381.8        | 2.046<br>5.641<br>10.160 | ±11/2 |
| 5   | 471.8        | 9.617<br>5.363<br>0.661  | ±9/2  | 479.2        | 0.659<br>4.913<br>12.460 | ±5/2  | 472.0        | 0.295<br>4.804<br>11.568 | ±9/2  |

|     |              |                          |                      |              |                          |                      |              |                          |                      |
|-----|--------------|--------------------------|----------------------|--------------|--------------------------|----------------------|--------------|--------------------------|----------------------|
| 6   | 494.8        | 1.546<br>2.548<br>12.472 | $\pm 7/2$            | 527.9        | 4.231<br>5.135<br>10.516 | $\pm 7/2$            | 508.1        | 2.605<br>3.525<br>12.813 | $\pm 7/2$            |
| 7   | 573.7        | 0.222<br>1.643<br>15.608 | $\pm 3/2$            | 593.4        | 0.529<br>0.787<br>16.283 | $\pm 3/2$            | 583.4        | 0.768<br>1.516<br>15.787 | $\pm 3/2$            |
| 8   | 619.4        | 0.964<br>1.439<br>17.749 | $\pm 1/2$            | 639.9        | 0.954<br>1.247<br>18.127 | $\pm 1/2$            | 627.6        | 1.027<br>1.897<br>17.503 | $\pm 1/2$            |
| KDs | <b>4_Dy1</b> |                          |                      | <b>4_Dy2</b> |                          |                      | <b>4_Dy3</b> |                          |                      |
|     | <i>E</i>     | <i>g</i>                 | <i>m<sub>J</sub></i> | <i>E</i>     | <i>g</i>                 | <i>m<sub>J</sub></i> | <i>E</i>     | <i>g</i>                 | <i>m<sub>J</sub></i> |
| 1   | 0.0          | 0.008<br>0.015<br>19.600 | $\pm 15/2$           | 0.0          | 0.003<br>0.009<br>19.721 | $\pm 15/2$           | 0.0          | 0.003<br>0.009<br>19.699 | $\pm 15/2$           |
| 2   | 208.9        | 0.150<br>0.200<br>16.894 | $\pm 13/2$           | 205.9        | 0.203<br>0.219<br>17.166 | $\pm 13/2$           | 193.8        | 0.199<br>0.221<br>17.114 | $\pm 13/2$           |
| 3   | 391.6        | 3.420<br>5.488<br>10.530 | $\pm 11/2$           | 367.7        | 1.587<br>4.666<br>12.691 | $\pm 11/2$           | 353.7        | 1.069<br>3.533<br>12.843 | $\pm 11/2$           |
| 4   | 444.0        | 10.838<br>5.610<br>0.081 | $\pm 1/2$            | 404.9        | 8.000<br>6.781<br>0.864  | $\pm 1/2$            | 388.3        | 8.582<br>7.211<br>0.209  | $\pm 1/2$            |
| 5   | 482.9        | 2.040<br>2.852<br>14.371 | $\pm 5/2$            | 490.1        | 11.049<br>5.896<br>0.028 | $\pm 5/2$            | 458.7        | 0.796<br>5.703<br>11.409 | $\pm 5/2$            |
| 6   | 544.7        | 10.397<br>7.154<br>1.866 | $\pm 9/2$            | 543.6        | 3.719<br>3.849<br>11.341 | $\pm 7/2$            | 526.5        | 3.590<br>4.165<br>11.181 | $\pm 7/2$            |
| 7   | 583.1        | 1.950<br>2.231<br>13.552 | $\pm 7/2$            | 621.0        | 0.657<br>2.353<br>15.171 | $\pm 3/2$            | 590.4        | 0.785<br>2.498<br>15.892 | $\pm 3/2$            |
| 8   | 737.1        | 0.098<br>0.135<br>19.500 | $\pm 1/2$            | 657.2        | 1.178<br>3.010<br>16.722 | $\pm 1/2$            | 634.3        | 0.922<br>1.404<br>17.537 | $\pm 7/2$            |
| KDs | <b>4_Dy4</b> |                          |                      | <b>5_Dy1</b> |                          |                      |              |                          |                      |
|     | <i>E</i>     | <i>g</i>                 | <i>m<sub>J</sub></i> | <i>E</i>     | <i>g</i>                 | <i>m<sub>J</sub></i> |              |                          |                      |
| 1   | 0.0          | 0.012<br>0.021<br>19.627 | $\pm 15/2$           | 0.0          | 0.005<br>0.011<br>19.674 | $\pm 15/2$           |              |                          |                      |
| 2   | 215.1        | 0.209<br>0.276<br>16.879 | $\pm 13/2$           | 185.3        | 0.144<br>0.193<br>17.032 | $\pm 13/2$           |              |                          |                      |



|   |       |                          |            |       |                          |            |  |  |  |
|---|-------|--------------------------|------------|-------|--------------------------|------------|--|--|--|
| 3 | 406.6 | 2.520<br>4.821<br>11.405 | $\pm 11/2$ | 316.8 | 0.846<br>1.307<br>17.339 | $\pm 1/2$  |  |  |  |
| 4 | 477.6 | 9.662<br>7.426<br>0.883  | $\pm 1/2$  | 384.9 | 1.970<br>4.368<br>10.109 | $\pm 11/2$ |  |  |  |
| 5 | 535.1 | 0.048<br>5.106<br>13.857 | $\pm 5/2$  | 471.4 | 1.395<br>4.521<br>13.031 | $\pm 3/2$  |  |  |  |
| 6 | 582.7 | 3.840<br>5.770<br>9.475  | $\pm 9/2$  | 508.7 | 2.930<br>4.375<br>10.070 | $\pm 7/2$  |  |  |  |
| 7 | 648.2 | 0.951<br>1.166<br>18.001 | $\pm 5/2$  | 560.1 | 0.622<br>2.122<br>13.432 | $\pm 9/2$  |  |  |  |
| 8 | 709.2 | 0.274<br>0.433<br>19.245 | $\pm 1/2$  | 661.3 | 0.152<br>0.263<br>18.788 | $\pm 7/2$  |  |  |  |

Table S10. Wave functions with definite projection of the total moment  $|m_j\rangle$  for the lowest eight KDs of individual Dy<sup>III</sup> fragments for complexes **1–5** using CASSCF/RASSI-SO with the OpenMolcas.

|              | $E/\text{cm}^{-1}$ | wave functions                                                                                                                                                  |
|--------------|--------------------|-----------------------------------------------------------------------------------------------------------------------------------------------------------------|
| <b>1_Dy1</b> | 0.0                | 94.7% $  \pm 15/2 \rangle$                                                                                                                                      |
|              | 194.3              | 86.2% $  \pm 13/2 \rangle$ +6.3% $  \pm 11/2 \rangle$                                                                                                           |
|              | 298.8              | 32.3% $  \pm 1/2 \rangle$ +27.8% $  \pm 3/2 \rangle$ +13.2% $  \pm 5/2 \rangle$ +10.4% $  \pm 11/2 \rangle$ +7.8% $  \pm 9/2 \rangle$ +7.8% $  \pm 7/2 \rangle$ |
|              | 376.0              | 55.1% $  \pm 11/2 \rangle$ +12.8% $  \pm 1/2 \rangle$ +10.8% $  \pm 9/2 \rangle$ +8.7% $  \pm 13/2 \rangle$ +5.7% $  \pm 7/2 \rangle$                           |
|              | 471.8              | 25.8% $  \pm 9/2 \rangle$ +23% $  \pm 5/2 \rangle$ +22.2% $  \pm 3/2 \rangle$ +11.7% $  \pm 1/2 \rangle$ +10.2% $  \pm 11/2 \rangle$                            |
|              | 632.3              | 47.2% $  \pm 7/2 \rangle$ +22.2% $  \pm 9/2 \rangle$ +19.3% $  \pm 5/2 \rangle$ +5.9% $  \pm 11/2 \rangle$                                                      |
|              | 707.2              | 25.6% $  \pm 3/2 \rangle$ +23.2% $  \pm 5/2 \rangle$ +17.1% $  \pm 9/2 \rangle$ +13.1% $  \pm 7/2 \rangle$ +12% $  \pm 1/2 \rangle$                             |
|              | 754.6              | 27.1% $  \pm 1/2 \rangle$ +21.5% $  \pm 7/2 \rangle$ +19.3% $  \pm 3/2 \rangle$ +18% $  \pm 5/2 \rangle$ +12.3% $  \pm 9/2 \rangle$                             |
| <b>2_Dy1</b> | 0.0                | 97.4% $  \pm 15/2 \rangle$                                                                                                                                      |
|              | 200.9              | 83.3% $  \pm 13/2 \rangle$ +8.3% $  \pm 11/2 \rangle$                                                                                                           |
|              | 350.4              | 27.2% $  \pm 3/2 \rangle$ +23.5% $  \pm 11/2 \rangle$ +23.2% $  \pm 1/2 \rangle$ +10.6% $  \pm 5/2 \rangle$ +8.8% $  \pm 9/2 \rangle$                           |
|              | 394.8              | 37.5% $  \pm 11/2 \rangle$ +23.1% $  \pm 1/2 \rangle$ +12.9% $  \pm 7/2 \rangle$ +10.6% $  \pm 9/2 \rangle$ +9.6% $  \pm 13/2 \rangle$                          |
|              | 479.2              | 30.5% $  \pm 5/2 \rangle$ +21.4% $  \pm 3/2 \rangle$ +19% $  \pm 9/2 \rangle$ +12.2% $  \pm 1/2 \rangle$ +7.9% $  \pm 11/2 \rangle$                             |
|              | 527.9              | 44% $  \pm 7/2 \rangle$ +28% $  \pm 9/2 \rangle$ +12.3% $  \pm 5/2 \rangle$ +12.1% $  \pm 11/2 \rangle$                                                         |

|              |       |                                                                         |
|--------------|-------|-------------------------------------------------------------------------|
|              | 593.4 | 28.7% ±3/2>+26.3% ±5/2>+15.3% ±9/2>+12.1% ±7/2>+10.1% ±1/2>+7.1% ±11/2> |
|              | 639.9 | 28.8% ±1/2>+20.2% ±7/2>+18.7% ±3/2>+16.9% ±5/2>+13.2% ±9/2>             |
| <b>3_Dy1</b> | 0.0   | 97.1% ±15/2>                                                            |
|              | 195.3 | 85.1% ±13/2>+6.8% ±11/2>                                                |
|              | 317.3 | 31.3% ±1/2>+28% ±3/2>+12.9% ±5/2>+12.3% ±11/2>+7.6% ±9/2>               |
|              | 381.8 | 52.8% ±11/2>+13.8% ±1/2>+9.5% ±13/2>+9.1% ±9/2>+8.2% ±7/2>              |
|              | 472.0 | 27.7% ±9/2>+25% ±5/2>+20.8% ±3/2>+11.7% ±1/2>+7.8% ±11/2>               |
|              | 508.1 | 46.7% ±7/2>+20.4% ±9/2>+18.6% ±5/2>+8.1% ±11/2>                         |
|              | 583.4 | 27.2% ±3/2>+22.1% ±5/2>+19.5% ±9/2>+11.3% ±7/2>+10.2% ±1/2>             |
|              | 627.6 | 28.7% ±1/2>+21.7% ±7/2>+18.8% ±3/2>+18.6% ±5/2>+11% ±9/2>               |
| <b>4_Dy1</b> | 0.0   | 95.6% ±15/2>                                                            |
|              | 208.9 | 84.6% ±13/2>+6.5% ±9/2>                                                 |
|              | 391.6 | 48.7% ±11/2>+20.8% ±3/2>+11.8% ±1/2>+5.4% ±7/2>+5.1% ±13/2>             |
|              | 444.0 | 49.6% ±1/2>+17.6% ±9/2>+14% ±11/2>+5.7% ±7/2>+5.2% ±13/2>               |
|              | 482.9 | 33.3% ±5/2>+29.4% ±3/2>+17% ±7/2>+7.9% ±11/2>+6.4% ±9/2>                |
|              | 544.7 | 32.9% ±9/2>+20.4% ±7/2>+13.6% ±11/2>+13.3% ±5/2>+11.6% ±3/2>            |
|              | 583.1 | 33.9% ±7/2>+24.9% ±5/2>+24.5% ±9/2>+10.3% ±3/2>                         |
|              | 737.1 | 27.7% ±1/2>+24.4% ±3/2>+20% ±5/2>+16.1% ±7/2>+9.1% ±9/2>                |
| <b>4_Dy2</b> | 0.0   | 97.9% ±15/2>                                                            |
|              | 205.9 | 82.2% ±13/2>+9% ±11/2>                                                  |
|              | 367.7 | 38.3% ±11/2>+22.5% ±3/2>+11.7% ±1/2>+11.5% ±9/2>+7.1% ±5/2>             |
|              | 404.9 | 33.1% ±1/2>+21.4% ±11/2>+17% ±7/2>+9.9% ±9/2>+7.2% ±13/2>+6.2% ±3/2>    |
|              | 490.1 | 29.9% ±5/2>+22% ±9/2>+21.1% ±3/2>+8.5% ±1/2>+8% ±11/2>+6.7% ±7/2>       |
|              | 543.6 | 41.1% ±7/2>+22.8% ±9/2>+15% ±5/2>+12.4% ±11/2>                          |
|              | 621.0 | 34% ±3/2>+26.6% ±5/2>+14.3% ±9/2>+9.1% ±7/2>+8.3% ±11/2>                |
|              | 657.2 | 32.8% ±1/2>+22.1% ±7/2>+14.7% ±5/2>+14.6% ±3/2>+14.2% ±9/2>             |
| <b>4_Dy3</b> | 0.0   | 97.4% ±15/2>                                                            |
|              | 193.8 | 82.3% ±13/2>+8.4% ±11/2>                                                |
|              | 353.7 | 40% ±11/2>+24.2% ±3/2>+10.6% ±9/2>+10.3% ±1/2>+6.8% ±5/2>               |
|              | 388.3 | 39.1% ±1/2>+18.8% ±7/2>+17.5% ±11/2>+9.5% ±9/2>+5.9% ±13/2>             |
|              | 458.7 | 32.9% ±5/2>+22.1% ±3/2>+17.8% ±9/2>+9.8% ±11/2>+6.9% ±1/2>+5.8% ±7/2>   |
|              | 526.5 | 39.1% ±7/2>+27.8% ±9/2>+13% ±11/2>+9.6% ±1/2>+8.4% ±5/2>                |
|              | 590.4 | 37.7% ±3/2>+32.9% ±5/2>+10.7% ±1/2>+7.2% ±9/2>+5.5% ±11/2>              |
|              | 634.3 | 27.5% ±7/2>+23.4% ±1/2>+21.5% ±9/2>+13.3% ±5/2>+9.9% ±3/2>              |
| <b>4_Dy4</b> | 0.0   | 96.1% ±15/2>                                                            |
|              | 215.1 | 85.7% ±13/2>+6.3% ±9/2>                                                 |
|              | 406.6 | 58.9% ±11/2>+13.8% ±3/2>+8.2% ±7/2>+6.5% ±13/2>+4.7% ±1/2>              |
|              | 477.6 | 40.4% ±1/2>+27.9% ±9/2>+12.1% ±11/2>+5.7% ±7/2>+4.6% ±13/2>             |
|              | 535.1 | 37% ±5/2>+32.5% ±3/2>+13.3% ±7/2>+9.2% ±1/2>                            |

|              |       |                                                                                                                         |
|--------------|-------|-------------------------------------------------------------------------------------------------------------------------|
|              | 582.7 | $41.1\% \pm 9/2\rangle + 31.9\% \pm 7/2\rangle + 13.1\% \pm 11/2\rangle + 4.9\% \pm 5/2\rangle$                         |
|              | 648.2 | $29.1\% \pm 5/2\rangle + 22.3\% \pm 3/2\rangle + 21.6\% \pm 7/2\rangle + 13\% \pm 1/2\rangle + 11.3\% \pm 9/2\rangle$   |
|              | 709.2 | $27.9\% \pm 1/2\rangle + 23.6\% \pm 3/2\rangle + 20.2\% \pm 5/2\rangle + 17.8\% \pm 7/2\rangle + 8.8\% \pm 9/2\rangle$  |
| <b>5_Dy1</b> | 0.0   | $96.9\% \pm 15/2\rangle$                                                                                                |
|              | 185.3 | $88.6\% \pm 13/2\rangle + 5.6\% \pm 11/2\rangle$                                                                        |
|              | 316.8 | $28.3\% \pm 1/2\rangle + 24.9\% \pm 3/2\rangle + 17.1\% \pm 11/2\rangle + 12.1\% \pm 5/2\rangle + 9.7\% \pm 9/2\rangle$ |
|              | 384.9 | $53.3\% \pm 11/2\rangle + 17.1\% \pm 1/2\rangle + 9.4\% \pm 9/2\rangle + 7.2\% \pm 13/2\rangle + 6.3\% \pm 7/2\rangle$  |
|              | 471.4 | $26\% \pm 3/2\rangle + 22.5\% \pm 9/2\rangle + 21.9\% \pm 5/2\rangle + 11\% \pm 1/2\rangle + 10.1\% \pm 7/2\rangle$     |
|              | 508.7 | $27.7\% \pm 7/2\rangle + 19\% \pm 5/2\rangle + 18.8\% \pm 1/2\rangle + 16.7\% \pm 9/2\rangle + 10.7\% \pm 3/2\rangle$   |
|              | 560.1 | $25.3\% \pm 9/2\rangle + 24.7\% \pm 7/2\rangle + 22.7\% \pm 5/2\rangle + 15.7\% \pm 3/2\rangle + 6.1\% \pm 11/2\rangle$ |
|              | 661.3 | $23\% \pm 7/2\rangle + 21.3\% \pm 5/2\rangle + 19.6\% \pm 1/2\rangle + 19.4\% \pm 3/2\rangle + 13.4\% \pm 9/2\rangle$   |

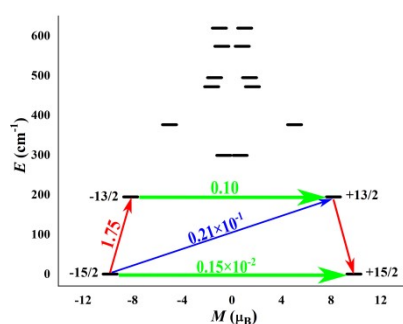

**1\_Dy1**

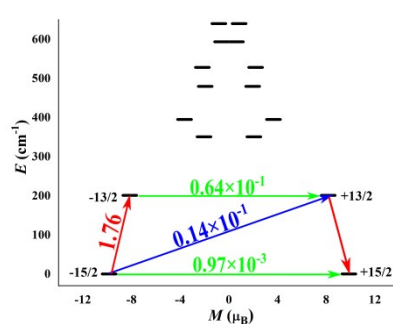

**2\_Dy1**

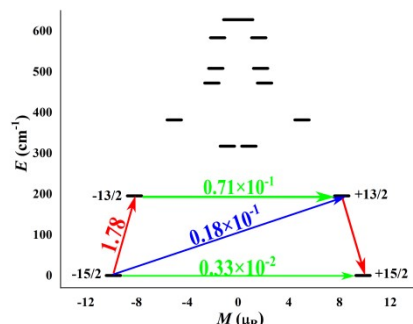

**3\_Dy1**

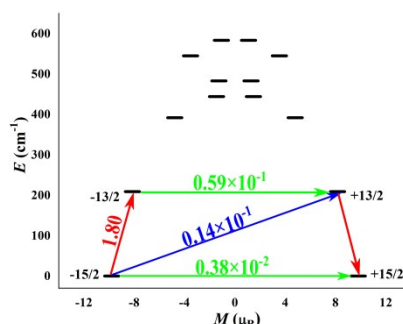

**4\_Dy1**

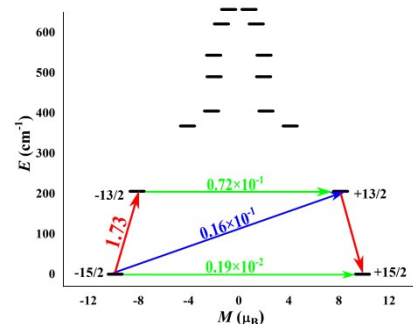

**4\_Dy2**

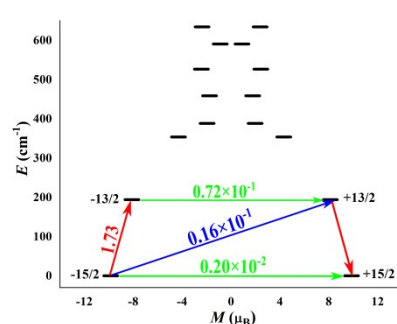

**4\_Dy3**

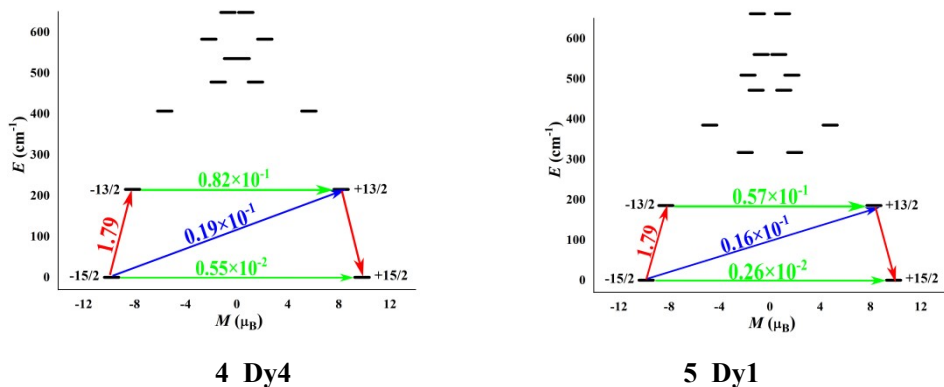

Fig. S17 Magnetization blocking barriers of individual Dy<sup>III</sup> fragments for complexes **1–5**. The thick black lines represent the KDs of the individual Dy<sup>III</sup> fragments as a function of their magnetic moment along the magnetic axis. The green lines correspond to diagonal matrix element of the transversal magnetic moment; the blue lines represent Orbach relaxation processes. The path shown by the red arrows represents the most probable path for magnetic relaxation in the corresponding compounds. The numbers at each arrow stand for the mean absolute value of the corresponding matrix element of transition magnetic moment.

To fit the exchange interactions between Dy<sup>III</sup> ions in complexes **1–5**, we took two steps to obtain them. Firstly, we calculated individual Dy<sup>III</sup> fragments using CASSCF/RASSI-SO to obtain the corresponding magnetic properties. Then, the exchange interaction between the magnetic centers was considered within the Lines model,<sup>S7</sup> while the account of the dipole-dipole magnetic coupling is treated exactly. The Lines model is effective and has been successfully used widely in the research field of *d* and *f*-elements single-molecule magnets.<sup>S8, S9</sup>

We only consider the interactions between the nearest neighbour Dy<sup>III</sup> ions. Thus, for complexes **1–5**, there is only one type of  $\tilde{J}$ .

The Ising exchange Hamiltonian for **1–5** is:

$$\hat{H}_{exch} = -\tilde{J} \hat{S}_{Dy1} \hat{S}_{Dy2} \quad (S1)$$

where  $\tilde{J} = 25 \cos \varphi J$ ,  $\varphi$  is the angle between the anisotropy axes on sites Dy1 and Dy2, and  $J$  is the Lines exchange coupling parameter. The  $S_{Dy} = 1/2$  is the ground pseudospin on the Dy<sup>III</sup> site. The total  $\tilde{J}_{total}$  is the parameter of the total magnetic interaction ( $\tilde{J}_{total} = \tilde{J}_{dipolar} + \tilde{J}_{exchange}$ ) between magnetic center ions. The dipolar magnetic couplings can be calculated exactly, while the Lines exchange coupling constants were fitted through comparison of the computed and measured magnetic susceptibilities using the POLY\_ANISO program.<sup>S4–S6</sup>

Table S11. Exchange energies  $E$  (cm<sup>-1</sup>), the transversal magnetic moments  $\Delta$ , (cm<sup>-1</sup>) and the main values of the  $g_z$  for the lowest two exchange doublets of complexes **1–5**.

|                   | 1              |                        |        | 2              |                        |        |
|-------------------|----------------|------------------------|--------|----------------|------------------------|--------|
| exchange doublets | $E$            | $\Delta_t$             | $g_z$  | $E$            | $\Delta_t$             | $g_z$  |
| 1                 | 0.000000000000 | $3.066 \times 10^{-7}$ | 39.337 | 0.000000000000 | $4.676 \times 10^{-8}$ | 39.395 |
|                   | 0.000000336613 |                        |        | 0.000000046761 |                        |        |
| 2                 | 2.332671384909 | $3.541 \times 10^{-7}$ | 0.000  | 3.223884231561 | $5.634 \times 10^{-8}$ | 0.000  |
|                   | 2.332671738984 |                        |        | 3.223884287897 |                        |        |
|                   | 3              |                        |        | 4-1            |                        |        |
| exchange doublets | $E$            | $\Delta_t$             | $g_z$  | $E$            | $\Delta_t$             | $g_z$  |
| 1                 | 0.000000000000 | $2.325 \times 10^{-6}$ | 39.362 | 0.000000000000 | $8.598 \times 10^{-7}$ | 39.106 |
|                   | 0.000002324782 |                        |        | 0.000000859815 |                        |        |
| 2                 | 0.309343811103 | $3.471 \times 10^{-6}$ | 0.000  | 1.454178112935 | $1.204 \times 10^{-6}$ | 4.115  |
|                   | 0.309347281803 |                        |        | 1.454179316856 |                        |        |
|                   | 4-2            |                        |        | 5              |                        |        |
| exchange doublets | $E$            | $\Delta_t$             | $g_z$  | $E$            | $\Delta_t$             | $g_z$  |
| 1                 | 0.000000000000 | $9.563 \times 10^{-7}$ | 39.149 | 0.000000000000 | $3.505 \times 10^{-7}$ | 39.349 |
|                   | 0.000000956329 |                        |        | 0.000000351528 |                        |        |
| 2                 | 2.024876112109 | $1.373 \times 10^{-6}$ | 3.741  | 2.464844854685 | $5.342 \times 10^{-7}$ | 0.000  |
|                   | 2.024877485277 |                        |        | 2.464845388853 |                        |        |

### References:

- S1 I. F. Galván, M. Vacher, A. Alavi, C. Angeli, F. Aquilante, J. Autschbach, J. J. Bao, S. I. Bokarev, N. A. Bogdanov, R. K. Carlson, L. F. Chibotaru, J. Creutzberg, N. Dattani, M. G. Delcey, S. S. Dong, A. Dreuw, L. Freitag, L. M. Frutos, L. Gagliardi, F. Gendron, A. Giussani, L. González, G. Grell, M. Y. Guo, C. E. Hoyer, M. Johansson, S. Keller, S. Knecht, G. Kovacevic, E. Källman, G. L. Manni, M. Lundberg, Y. J. Ma, S. Mai, J. P. Malhado, P. Å. Malmqvist, P. Marquetand, S. A. Mewes, J. Norell, M. Olivucci, M. Oppel, Q. M. Phung, K. Pierloot, F. Plasser, M. Reiher, A. M. Sand, I. Schapiro, P. Sharma, C. J. Stein, L. K. Sørensen, D. G. Truhlar, M. Ugandi, L. Ungur, A. Valentini, S. Vancoillie, V. Veryazov, O. Weser, T. A. Wesolowski, Per-Olof. Widmark, S. Wouters, A. Zech, J. P. Zobel, R. Lindh. OpenMolcas: From Source Code to Insight. *J. Chem. Theory Comput.* 2019, **15**, 5925–5964.
- S2 P. Å. Malmqvist, B. O. Roos, B. Schimmelpfennig, The restricted active space (RAS) state interaction approach with spin–orbit coupling *Chem. Phys. Lett.*, 2002, **357**, 230–240.
- S3 B. A. Heß, C. M. Marian, U. Wahlgren, O. Gropen, A mean-field spin-orbit method applicable to correlated wavefunctions *Chem. Phys. Lett.*, 1996, **251**, 365–371.
- S4 L. F. Chibotaru, L. Ungur, A. Soncini, The Origin of Nonmagnetic Kramers Doublets in the Ground State of Dysprosium Triangles: Evidence for a Toroidal Magnetic Moment *Angew.*

- Chem., Int. Ed.* 2008, **47**, 4126–4129.
- S5 L. Ungur, W. Van den Heuvel, L. F. Chibotaru, Ab initio investigation of the non-collinear magnetic structure and the lowest magnetic excitations in dysprosium triangles *New J. Chem.* 2009, **33**, 1224–1230.
- S6 L. F. Chibotaru, L. Ungur, C. Aronica, H. Elmoll, G. Pilet, D. Luneau, Structure, Magnetism, and Theoretical Study of a Mixed-Valence  $\text{Co}^{\text{II}}_3\text{Co}^{\text{III}}_4$  Heptanuclear Wheel: Lack of SMM Behavior despite Negative Magnetic Anisotropy *J. Am. Chem. Soc.* 2008, **130**, 12445–12455.
- S7 M. E. Lines, Orbital Angular Momentum in the Theory of Paramagnetic Clusters *J. Chem. Phys.* 1971, **55**, 2977–2984.
- S8 K. C. Mondal, A. Sundt, Y. H. Lan, G. E. Kostakis, O. Waldmann, L. Ungur, L. F. Chibotaru, C. E. Anson, A. K. Powell, Coexistence of Distinct Single-Ion and Exchange-Based Mechanisms for Blocking of Magnetization in a  $\text{Co}^{\text{II}}_2\text{Dy}^{\text{III}}_2$  Single-Molecule Magnet *Angew. Chem., Int. Ed.* 2012, **51**, 7550–7554.
- S9 S. K. Langley, D. P. Wielechowski, V. Vieru, N. F. Chilton, B. Moubaraki, B. F. Abrahams, L. F. Chibotaru, K. S. Murray, A  $\{\text{Cr}^{\text{III}}_2\text{Dy}^{\text{III}}_2\}$  Single-Molecule Magnet: Enhancing the Blocking Temperature through 3d Magnetic Exchange *Angew. Chem., Int. Ed.* 2013, **52**, 12014–12019.
